# Supplementary material for: Influence of mechanical stress on flexible electrolyte-gated organic field-effect transistors
Source: Royal Society of Chemistry journal article supplement (doi:10.1039/d4tc05403b), 2025-01-01
Supplement: d4tc05403b1.pdf [file d4tc05403b1.pdf]

*Supporting Information*

**Influence of mechanical stress on flexible electrolyte-gated organic field-effect transistors**

Sara Ruiz-Molina,<sup>1,⊥</sup> Simona Ricci,<sup>1,⊥</sup> Carme Martínez-Domingo,<sup>1</sup> María Jesús Ortiz-Aguayo,<sup>1</sup> Raphael Pfattner,<sup>1</sup> G. Schweicher,<sup>2</sup> Y. H. Geerts,<sup>2,3</sup> Tommaso Salzillo,<sup>1,Ω</sup> Marta Mas-Torrent<sup>1,\*</sup>

<sup>1</sup>Institut de Ciència de Materials de Barcelona, ICMA-B-CSIC, Campus UAB, 08193 Bellaterra, Spain.

<sup>2</sup> Laboratoire de Chimie des Polymères, CP 206/01 Faculté des Sciences Université libre de Bruxelles (ULB), Boulevard du Triomphe 1050 Brussels (Belgium).

<sup>3</sup> International Solvay Institutes of Physics and Chemistry, Boulevard du Triomphe, CP 231, 1050 Bruxelles, Belgium

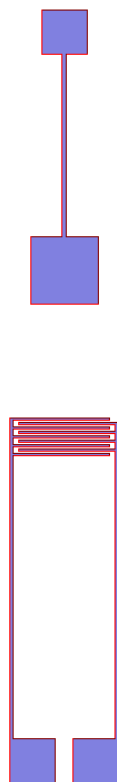

**Figure S1.** Device layout.  $W=18000\ \mu\text{m}$ ,  $L=50\ \mu\text{m}$ ,  $W/L=360$ . The coplanar gate electrode's area is equal to  $2.25\ \text{mm}^2$ .

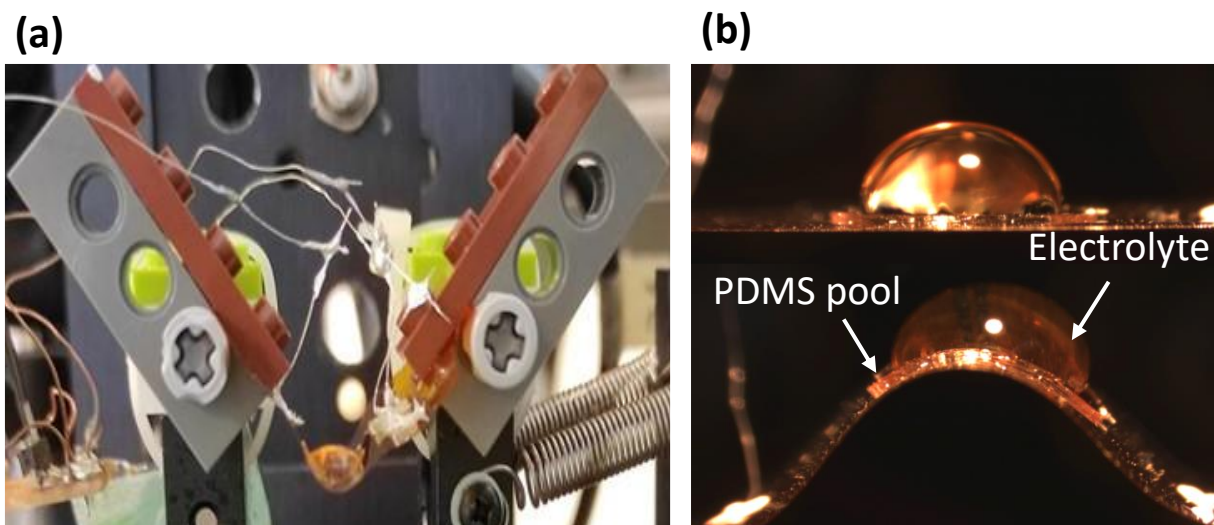

**Figure S2.** (a) Setup for mechanical stress and (b) photography of devices with Milli-Q water in flat configuration and during the application of stress.

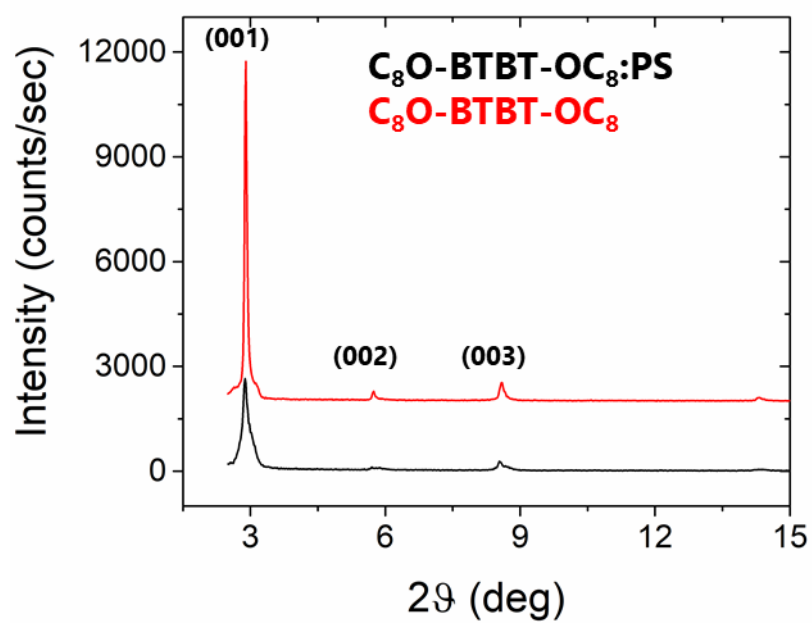

**Figure S3.** X-ray diffractograms of films based on C<sub>8</sub>O-BTBT-OC<sub>8</sub> and C<sub>8</sub>O-BTBT-OC<sub>8</sub>:PS prepared by BAMS.

Supporting Information

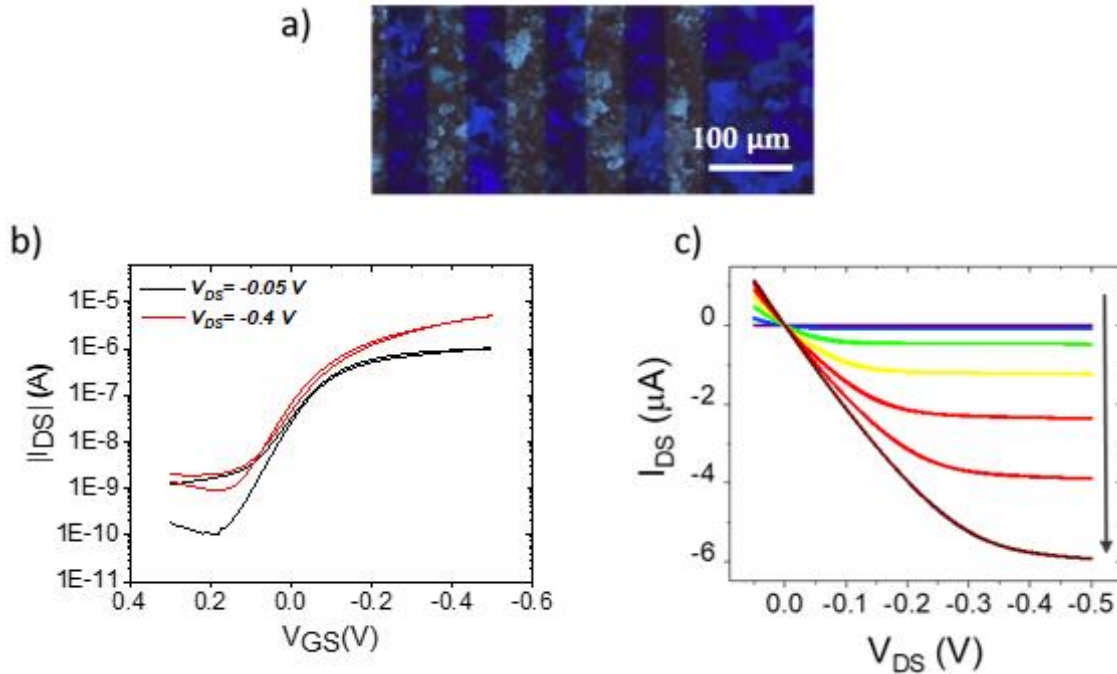

**Figure S4.** Electrical characterization of EGOFETs based on  $C_{8}O$ -BTBT- $OC_{8}$ :PS films fabricated on Si/SiO<sub>2</sub> substrates and using Milli-Q water as electrolyte. (a) POM image of the film. (b) Transfer characteristics ( $V_{DS} = -0.05$  V (black line) and  $V_{DS} = -0.4$  V (red line)). (c) output characteristics recorded at  $V_{GS} = 0.35$  V,  $0.20$  V,  $0.05$  V,  $-0.1$  V,  $-0.25$  V,  $0.40$  V and  $-0.55$  V (in the direction of the arrow).

Supporting Information

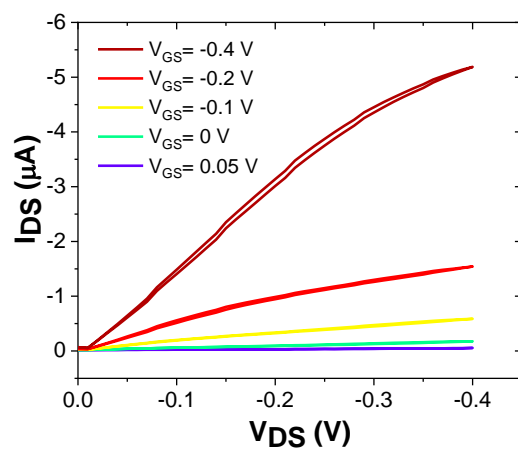

**Figure S5.** Output characteristics ( $V_{GS} = 0.05, 0, -0.1, -0.2,$  and  $-0.4$  V) of C<sub>8</sub>O-BTBT-OC<sub>8</sub>:PS-based thin film on Kapton using Milli-Q water as electrolyte.

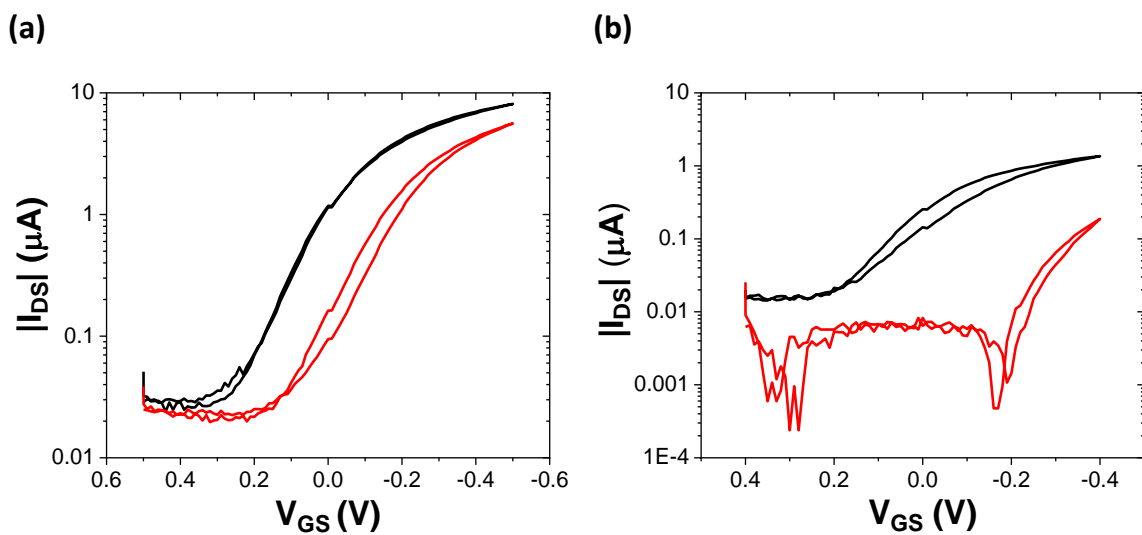

**Figure S6.** Transfers characteristics ( $V_{DS} = -0.1$  V) of (a) diF-TES-ADT:PS and (b) C<sub>8</sub>O-BTBT-OC<sub>8</sub>:PS EGOFETs before (black curves) and after (red curves) performing a bias stress test that consisted of applying a source-drain voltage ( $V_{DS}$ ) and source-gate voltage ( $V_{GS}$ ) of -0.2 V for 9 minutes.

Supporting Information

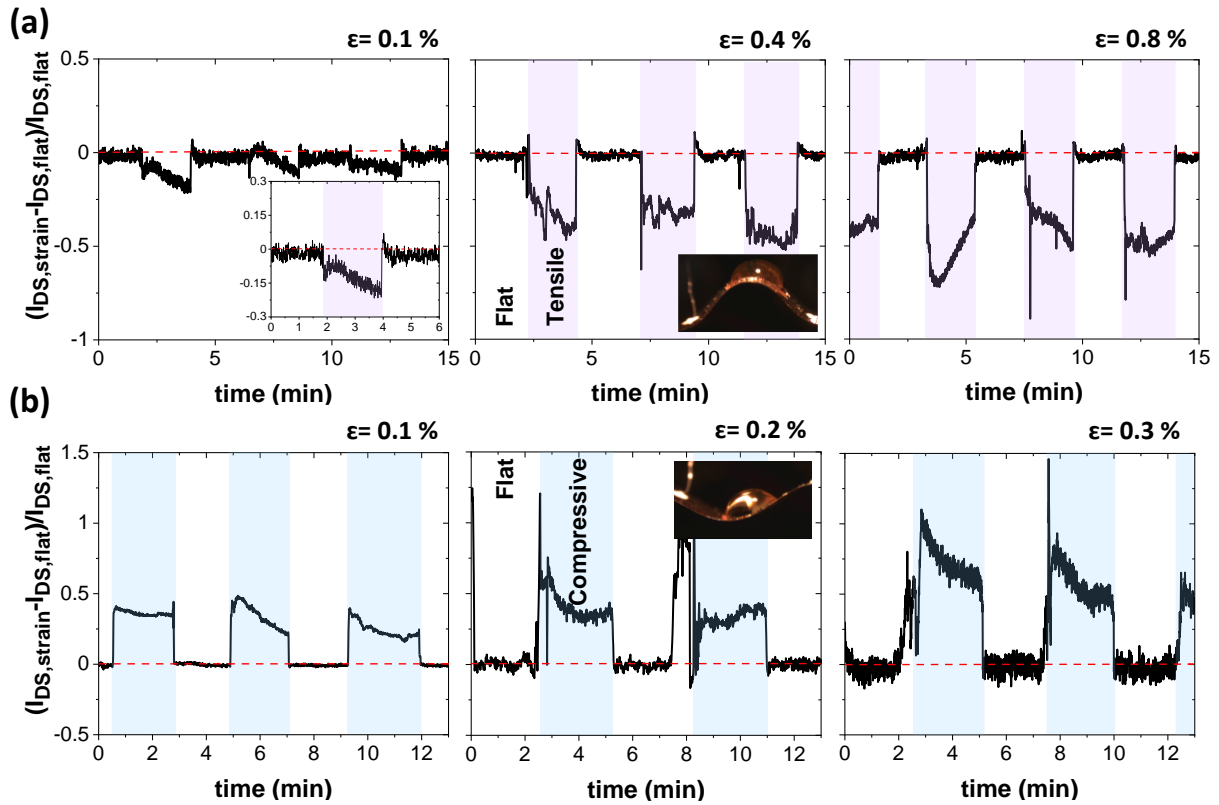

**Figure S7.** Real-time  $I_{DS}$  current monitoring of  $C_8O$ -BTBT- $OC_8$ : $PS_{100k}$  employing Milli-Q water fixing  $V_{DS} = -0.2$  V and  $V_{GS} = -0.2$  V, applying (a) cyclic tensile strain (purple regions) equal to 0.1, 0.4 and 0.8 %, respectively; and (b) cyclic compressive strain (blue regions) equal to 0.1, 0.2 and 0.3 %, respectively.
